# Supplementary material for: Mechanisms of Uniconazole-Induced Male Flower Differentiation in Female Bayberry (Morella rubra) Trees
Source: Research Square preprint supplement (doi:10.21203/rs.3.rs-5368078/v1), 2024-11-15
Supplement: Supplementary file 1 [file 35c3620d6e749989a90d00f8.docx]

| Gene | Forward primer sequence (5'-3') | Reverse primer sequence (5'-3') |
| --- | --- | --- |
| GAPDH | AGCCTACATCGCTCTGGACT | GTGGTTTCGTGTATGCCAGC |
| MR6G019836 | GTGTTGCCTTAGGAGATT | ATGATTGTGACAGGGATT |
| MR6G008503 | TATGGCTGGTGTCGTTGG | GTGCTAATCCGAGTCCTG |
| MR1G010322 | CAGTGATTGGGCTCTTGT | TGAACTCGTTGGTCGTAT |
| MR2G023339 | CGATTCCTCCATAGTCAA | TCCCATCTCCCAGTTCTT |
| MR3G026541 | GGAGCGACCTTCCCTTTG | TTCCGCCTGCGACATAGA |
| MR1G018340 | GCGTGTCGTCCTCCTCTT | ACTCCCTGGTTGGATTGG |
| MR4G018381 | TGACTCACCCTATGGAAA | AGATTACGGTCAAACTGC |
| MR6G010832 | TCGAATGGGAGGTACAAG | ATGCTGACATGAGGGAAT |
| MR6G021506 | AGAGGAACCACGAAGGGAC | CCATTGGGTGCTGGATTA |
| MR4G016016 | AGCTCTGAGTCTCTTTCGCA | CCACGTGAGGTTTAGCTTCG |
| MR4G025315 | CATTAGTCACTGCCGTCACG | ATTCTCTCTCGCCATCCTCG |
| MR6G025594 | CCGGCGGAGTAGTTTACAGA | ACCCAACTGCCAAGACGATA |
| MR2G007342 | ATGTCAGAGAAGCAACCCCA | GCCAAGGATCACAACGACAG |
| MR3G015028 | GAGGTGCTATCAGAGGCCAT | CACCTGATCCTGGAGCAAGA |
| MR5G022585 | TACAACACTCCCCAAACCCA | AGAGGAGAAGAGCGAACACC |
| MR0G004521 | ATGTCTAATGCTCGTGTC | TAGGAGGTATCAATCGTC |
| MR4G015426 | AATCAATAGGCAGGTGAC | AGCAGCCCATTTCTTCTC |

Table S1.The target gene sequence verified by q-PCR
